# Supplementary material
Source: PubMed Central journal article supplement (PMC4068830)
Supplement: NIHMS582501-supplement-01.pdf [file NIHMS582501-supplement-01.pdf]

## Supplementary Tables

| Family <sup>a</sup> | Function <sup>b</sup>                                                          | Template Structure <sup>c</sup>                                                                             | Percent Sequence Identity <sup>d</sup> | Representative Ligands <sup>e</sup>                                                                                                                                                                                                                                                                                                           |
|---------------------|--------------------------------------------------------------------------------|-------------------------------------------------------------------------------------------------------------|----------------------------------------|-----------------------------------------------------------------------------------------------------------------------------------------------------------------------------------------------------------------------------------------------------------------------------------------------------------------------------------------------|
| SLC1 (7)            | High-affinity glutamate and neutral amino acid transporter family              | <br>Glt(Ph) <sup>16</sup>  | 34 ( $3.6 \times 10^{-90}$ )           | Glutamate <sup>3</sup> , glutamine <sup>3</sup>                                                                                                                                                                                                                                                                                               |
| SLC2 (14)           | Facilitative glucose transporters                                              | <br>XylE <sup>*17</sup>    | 31 ( $2.8 \times 10^{-54}$ )           | Glucose <sup>3</sup> , uric acid <sup>3</sup>                                                                                                                                                                                                                                                                                                 |
| SLC5 (12)           | Na <sup>+</sup> - glucose co-transporters                                      | <br>vSGLT <sup>#18</sup>  | 32 ( $1.1 \times 10^{-69}$ )           | Dapagliflozin <sup>2</sup> , canagliflozin <sup>2</sup> , ipragliflozin <sup>2</sup>                                                                                                                                                                                                                                                          |
| SLC6 (21)           | Na <sup>+</sup> - and Cl <sup>-</sup> -dependent neurotransmitter transporters | <br>LeuT <sup>#19</sup>  | 26 ( $6 \times 10^{-109}$ )            | Fluoxetine <sup>1</sup> , fluvoxamine <sup>1</sup> , citalopram <sup>1</sup> , venlafaxine <sup>1</sup> , paroxetine <sup>1</sup> , radioiodinated metaiodobenzylguanidine <sup>2</sup> ( <sup>131</sup> I-MIBG), serotonin <sup>3</sup> , norepinephrine <sup>3</sup> , dopamine <sup>3</sup> , GABA <sup>3</sup> , amino acids <sup>3</sup> |
| SLC13 (5)           | Na <sup>+</sup> -sulfate/carboxylate co-transporters                           | <br>VcINDY <sup>20</sup> | 32 ( $1.7 \times 10^{-47}$ )           | Succinate <sup>3</sup> , citrate <sup>3</sup> , alpha-ketoglutarate <sup>3</sup>                                                                                                                                                                                                                                                              |
| SLC25 (46)          | Mitochondrial carriers                                                         | <br>UCP2 <sup>21</sup>   | 96 ( $1.4 \times 10^{-62}$ )           | Citrate <sup>3</sup> , ornithine <sup>3</sup> , adenosine triphosphate <sup>3</sup> , aspartate <sup>3</sup> , thiamine pyrophosphate <sup>3</sup>                                                                                                                                                                                            |

|           |                                      |                                                                                                          |                               |                                  |
|-----------|--------------------------------------|----------------------------------------------------------------------------------------------------------|-------------------------------|----------------------------------|
| SLC37 (4) | Sugar-phosphate/phosphate exchangers | 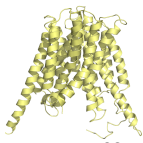<br>GlpT <sup>*22</sup> | 25 (6.2 × 10 <sup>-45</sup> ) | Glucose-6-phosphate <sup>3</sup> |
|-----------|--------------------------------------|----------------------------------------------------------------------------------------------------------|-------------------------------|----------------------------------|

**Supplementary Table 1: Selected SLC families (which contain drug targets) that can be modeled based on a template structures.**

- a *Family* marks the human SLC family, as annotated by the Bioparadigms database<sup>23</sup>. The number of human protein sequences in the family is provided in parenthesis.
- b *Function* gives the function of the human family, as described in the Bioparadigms database
- c *Template Structure* describes the most related atomic structure to the family. Structures with the MFS and NSS folds are marked with '\*' and '#', respectively.
- d *Percent Sequence Identity* provides the percent sequence identity of the best scoring hit from each family; E-value is given in parenthesis.
- e *Representative Ligands* gives examples of small molecules that interacts with the transporter. A small molecule ligand can be one of the following:
- <sup>1</sup>Clinical drug that is an inhibitor of the transporter.
- <sup>2</sup>Clinical drug that is a substrate of the transporter.
- <sup>3</sup>Endogenous compound that is substrate of the transporter.
